# Supplementary material
Source: PubMed Central journal article supplement (PMC3025450)
Supplement: NIHMS239109-supplement-1_si_001.pdf [file NIHMS239109-supplement-1_si_001.pdf]

# Cellular Response of Polyvalent Oligonucleotide Gold Nanoparticle Conjugates

*Matthew D. Massich, David A. Giljohann, Abrin L. Schmucker, Pinal C. Patel, and Chad A. Mirkin\**

Department of Chemistry and International Institute for Nanotechnology, Northwestern University, 2145

Sheridan Road, Evanston, IL 60208 USA

## Supplemental Table S1

| Nanoparticle Type | Size (nm)      | Zeta Potential (mV) |
|-------------------|----------------|---------------------|
| Citrate           | 17.19 +/- 1.05 | -32.33 +/- 1.59     |
| BSA               | 74.25 +/- 1.61 | -34.30 +/- 0.85     |
| ssDNA             | 25.81 +/- 0.97 | -30.73 +/- 1.22     |
| dsDNA             | 26.63 +/- 0.76 | -28.33 +/- 1.55     |
| dsRNA             | 27.00 +/- 1.05 | -28.83 +/- 2.57     |

### Table S1.

Average size and zeta potential measurements for the nanoparticle types tested in this study. These measurements were taken using a Zetasizer Nano ZS (Malvern).

## Supplemental Table S2

| Gene ID | Gene Name                                                                                   | Fold Change | P-value  |
|---------|---------------------------------------------------------------------------------------------|-------------|----------|
| 10572   | SIVA1, apoptosis-inducing factor                                                            | -2.13       | 2.01E-10 |
| 25824   | peroxiredoxin 5                                                                             | -2.01       | 4.09E-09 |
| 517     | ATP synthase, H <sup>+</sup> transporting, mitochondrial F0 complex, subunit C2 (subunit 9) | -2.00       | 2.31E-09 |
| 23016   | exosome component 7                                                                         | -1.99       | 8.14E-10 |
| 126328  | NADH dehydrogenase (ubiquinone) 1 alpha subcomplex, 11, 14.7kDa                             | -1.98       | 5.33E-07 |
| 3692    | eukaryotic translation initiation factor 6                                                  | -1.97       | 1.76E-08 |
| 10519   | calcium and integrin binding 1 (calmyrin)                                                   | -1.96       | 6.30E-05 |

|        |                                                                                                                                   |       |                      |
|--------|-----------------------------------------------------------------------------------------------------------------------------------|-------|----------------------|
| 8673   | vesicle-associated membrane protein 8 (endobrevin)                                                                                | -1.96 | 1.68E-04             |
| 92856  | IMP4, U3 small nucleolar ribonucleoprotein, homolog (yeast)                                                                       | -1.96 | 8.67E-04             |
| 389541 | chromosome 7 open reading frame 59                                                                                                | -1.93 | 2.56E-08             |
| 51264  | mitochondrial ribosomal protein L27                                                                                               | -1.93 | 2.04E-09             |
| 5693   | proteasome (prosome, macropain) subunit, beta type, 5                                                                             | -1.91 | 3.45E-08             |
| 64951  | mitochondrial ribosomal protein S24                                                                                               | -1.90 | 1.56E-07             |
| 389    | ras homolog gene family, member C                                                                                                 | -1.86 | 6.28E-07             |
| 113246 | chromosome 12 open reading frame 57                                                                                               | -1.86 | 1.21E-07             |
| 5694   | proteasome (prosome, macropain) subunit, beta type, 6                                                                             | -1.86 | 1.56E-07             |
| 2109   | electron-transfer-flavoprotein, beta polypeptide                                                                                  | -1.85 | 7.84E-08             |
| 79019  | centromere protein M                                                                                                              | -1.85 | 2.77E-07             |
| 51596  | cutA divalent cation tolerance homolog (E. coli)                                                                                  | -1.85 | 2.21E-09             |
| 26519  | translocase of inner mitochondrial membrane 10 homolog (yeast)                                                                    | -1.85 | 7.74E-09             |
| 10567  | Rab acceptor 1 (prenylated)                                                                                                       | -1.84 | 3.46E-07             |
| 10430  | transmembrane protein 147                                                                                                         | -1.84 | 2.74E-06             |
| 28989  | methyltransferase like 11A                                                                                                        | -1.84 | 4.91E-06             |
| 51693  | trafficking protein particle complex 2-like                                                                                       | -1.83 | 9.58E-05             |
| 516    | ATP synthase, H <sup>+</sup> transporting, mitochondrial F0 complex, subunit C1 (subunit 9)                                       | -1.81 | 4.80E-06             |
| 29074  | mitochondrial ribosomal protein L18                                                                                               | -1.78 | 3.06E-06             |
| 201254 | stimulated by retinoic acid 13 homolog (mouse)                                                                                    | -1.78 | 1.32E-05             |
| 6415   | selenoprotein W, 1                                                                                                                | -1.77 | 2.39E-10             |
| 6274   | S100 calcium binding protein A3                                                                                                   | -1.76 | 2.80E-05             |
| 140465 | myosin, light chain 6B, alkali, smooth muscle and non-muscle                                                                      | -1.74 | 6.59E-05             |
| 4815   | ninjurin 2                                                                                                                        | -1.74 | 1.22E-04             |
| 29100  | transmembrane protein 208                                                                                                         | -1.74 | 1.20E-08             |
| 51399  | trafficking protein particle complex 4                                                                                            | -1.74 | 2.55E-05             |
| 9636   | ISG15 ubiquitin-like modifier                                                                                                     | -1.73 | 5.50E-07             |
| 10084  | polyglutamine binding protein 1                                                                                                   | -1.73 | 1.60E-06             |
| 5435   | polymerase (RNA) II (DNA directed) polypeptide F                                                                                  | -1.73 | 4.21E-07             |
| 118472 | zinc finger protein 511                                                                                                           | -1.73 | 3.39E-05             |
| 10998  | solute carrier family 27 (fatty acid transporter), member 5                                                                       | -1.72 | 6.85E-08             |
| 725    | complement component 4 binding protein, beta                                                                                      | -1.72 | 1.54E-07             |
| 90637  | zinc finger, AN1-type domain 2A                                                                                                   | -1.71 | 9.08E-04             |
| 3028   | hydroxysteroid (17-beta) dehydrogenase 10<br>NADH dehydrogenase (ubiquinone) Fe-S protein 3, 30kDa (NADH-coenzyme Q<br>reductase) | -1.71 | 4.52E-08<br>9.62E-08 |
| 4722   |                                                                                                                                   |       |                      |
| 114915 | chromosome 5 open reading frame 26                                                                                                | -1.70 | 9.23E-08             |
| 9533   | polymerase (RNA) I polypeptide C, 30kDa                                                                                           | -1.70 | 2.62E-06             |
| 51024  | fission 1 (mitochondrial outer membrane) homolog (S. cerevisiae)                                                                  | -1.70 | 2.68E-08             |
| 83443  | splicing factor 3b, subunit 5, 10kDa                                                                                              | -1.70 | 7.33E-06             |
| 533    | ATPase, H <sup>+</sup> transporting, lysosomal 21kDa, V0 subunit b                                                                | -1.69 | 1.34E-05             |
| 2987   | guanylate kinase 1                                                                                                                | -1.69 | 2.55E-08             |
| 151903 | coiled-coil domain containing 12                                                                                                  | -1.68 | 1.54E-04             |
| 27243  | chromatin modifying protein 2A                                                                                                    | -1.68 | 1.73E-06             |
| 55272  | IMP3, U3 small nucleolar ribonucleoprotein, homolog (yeast)                                                                       | -1.68 | 1.02E-05             |
| 25915  | chromosome 3 open reading frame 60                                                                                                | -1.66 | 8.31E-05             |
| 60673  | chromosome 12 open reading frame 44                                                                                               | -1.66 | 4.87E-07             |
| 51728  | polymerase (RNA) III (DNA directed) polypeptide K, 12.3 kDa                                                                       | -1.66 | 8.55E-08             |
| 644    | biliverdin reductase A                                                                                                            | -1.65 | 1.38E-07             |
| 54512  | exosome component 4                                                                                                               | -1.65 | 5.10E-08             |
| 10591  | chromosome 6 open reading frame 108                                                                                               | -1.64 | 1.30E-05             |

|        |                                                                       |       |          |
|--------|-----------------------------------------------------------------------|-------|----------|
| 1351   | cytochrome c oxidase subunit 8A (ubiquitous)                          | -1.64 | 2.39E-05 |
| 5692   | proteasome (prosome, macropain) subunit, beta type, 4                 | -1.64 | 1.41E-05 |
| 2644   | GTP cyclohydrolase I feedback regulator                               | -1.64 | 3.95E-04 |
| 4637   | myosin, light chain 6, alkali, smooth muscle and non-muscle           | -1.64 | 6.66E-05 |
| 10436  | EMG1 nucleolar protein homolog ( <i>S. cerevisiae</i> )               | -1.64 | 9.64E-07 |
| 4713   | NADH dehydrogenase (ubiquinone) 1 beta subcomplex, 7, 18kDa           | -1.63 | 7.40E-06 |
| 4521   | nudix (nucleoside diphosphate linked moiety X)-type motif 1           | -1.63 | 7.83E-06 |
| 126003 | trafficking protein particle complex 5                                | -1.63 | 9.88E-05 |
| 51070  | nitric oxide synthase interacting protein                             | -1.62 | 3.65E-06 |
| 84058  | WD repeat domain 54                                                   | -1.62 | 1.07E-03 |
| 2950   | glutathione S-transferase pi 1                                        | -1.62 | 6.83E-06 |
| 51398  | chromosome 19 open reading frame 56                                   | -1.62 | 1.51E-05 |
| 1174   | adaptor-related protein complex 1, sigma 1 subunit                    | -1.62 | 3.70E-04 |
| 64949  | mitochondrial ribosomal protein S26                                   | -1.62 | 2.00E-04 |
| 51042  | zinc finger protein 593                                               | -1.61 | 5.34E-07 |
| 5691   | proteasome (prosome, macropain) subunit, beta type, 3                 | -1.61 | 1.88E-06 |
| 64963  | mitochondrial ribosomal protein S11                                   | -1.61 | 2.40E-03 |
| 28971  | chromosome 11 open reading frame 67                                   | -1.60 | 2.84E-06 |
| 63905  | mannosidase, beta A, lysosomal-like                                   | -1.60 | 6.86E-05 |
| 128308 | mitochondrial ribosomal protein L55                                   | -1.60 | 6.58E-04 |
| 5441   | polymerase (RNA) II (DNA directed) polypeptide L, 7.6kDa              | -1.59 | 4.07E-07 |
| 6132   | ribosomal protein L8                                                  | -1.59 | 1.41E-08 |
| 28958  | coiled-coil domain containing 56                                      | -1.58 | 7.54E-04 |
| 22921  | methionine sulfoxide reductase B2                                     | -1.58 | 1.20E-03 |
| 10535  | ribonuclease H2, subunit A                                            | -1.58 | 1.28E-07 |
| 9718   | endothelin converting enzyme 2                                        | -1.57 | 4.11E-07 |
| 30834  | zinc ribbon domain containing 1                                       | -1.57 | 1.25E-06 |
| 11258  | dynactin 3 (p22)                                                      | -1.57 | 1.36E-06 |
| 11018  | transmembrane emp24 protein transport domain containing 1             | -1.57 | 1.47E-03 |
| 4830   | non-metastatic cells 1, protein (NM23A) expressed in                  | -1.57 | 9.31E-06 |
| 54849  | differentially expressed in FDCP 8 homolog (mouse)                    | -1.56 | 2.19E-04 |
| 374395 | transmembrane protein 179B                                            | -1.56 | 6.24E-07 |
| 10467  | zinc finger, HIT type 1                                               | -1.56 | 7.63E-04 |
| 10134  | B-cell receptor-associated protein 31                                 | -1.56 | 9.79E-07 |
| 79159  | nucleolar protein 12                                                  | -1.56 | 1.00E-04 |
| 3420   | isocitrate dehydrogenase 3 (NAD+) beta                                | -1.55 | 7.88E-09 |
| 79622  | chromosome 16 open reading frame 33                                   | -1.55 | 4.40E-04 |
| 4809   | NHP2 non-histone chromosome protein 2-like 1 ( <i>S. cerevisiae</i> ) | -1.55 | 7.09E-05 |
| 5245   | prohibitin                                                            | -1.54 | 1.95E-03 |
| 6590   | secretory leukocyte peptidase inhibitor                               | -1.54 | 1.42E-05 |
| 55011  | PIH1 domain containing 1                                              | -1.54 | 3.71E-05 |
| 2091   | fibrillarin                                                           | -1.54 | 1.29E-04 |
| 22949  | prostaglandin reductase 1                                             | -1.54 | 2.00E-07 |
| 59     | actin, alpha 2, smooth muscle, aorta                                  | -1.54 | 1.60E-03 |
| 51013  | exosome component 1                                                   | -1.54 | 2.06E-03 |
| 58477  | signal recognition particle receptor, B subunit                       | -1.53 | 2.44E-03 |
| 11145  | HRAS-like suppressor 3                                                | -1.53 | 8.82E-07 |
| 84967  | LSM10, U7 small nuclear RNA associated                                | -1.53 | 1.95E-06 |
| 643997 | similar to peptidylprolyl isomerase A-like                            | -1.53 | 1.24E-05 |
| 56915  | exosome component 5                                                   | -1.53 | 5.87E-06 |

|        |                                                                                     |       |          |
|--------|-------------------------------------------------------------------------------------|-------|----------|
| 51647  | family with sequence similarity 96, member B                                        | -1.53 | 2.81E-04 |
| 6648   | superoxide dismutase 2, mitochondrial                                               | -1.53 | 2.16E-04 |
| 125144 | chromosome 17 open reading frame 45                                                 | -1.52 | 1.25E-03 |
| 1327   | cytochrome c oxidase subunit IV isoform 1                                           | -1.52 | 7.31E-04 |
| 2879   | glutathione peroxidase 4 (phospholipid hydroperoxidase)                             | -1.52 | 4.26E-06 |
| 56655  | polymerase (DNA-directed), epsilon 4 (p12 subunit)                                  | -1.52 | 1.86E-06 |
| 7389   | uroporphyrinogen decarboxylase                                                      | -1.51 | 1.48E-05 |
| 4792   | nuclear factor of kappa light polypeptide gene enhancer in B-cells inhibitor, alpha | -1.51 | 2.33E-03 |
| 79001  | vitamin K epoxide reductase complex, subunit 1                                      | -1.51 | 3.30E-05 |
| 6175   | ribosomal protein, large, P0                                                        | -1.51 | 3.51E-07 |
| 147184 | transmembrane protein 99                                                            | -1.51 | 5.65E-05 |
| 6183   | mitochondrial ribosomal protein S12                                                 | -1.51 | 3.01E-04 |
| 51335  | neugrin, neurite outgrowth associated                                               | -1.50 | 8.84E-04 |
| 8878   | sequestosome 1                                                                      | 1.50  | 3.18E-04 |
| 6448   | N-sulfoglucosamine sulfohydrolase                                                   | 1.51  | 5.01E-04 |
| 64764  | cAMP responsive element binding protein 3-like 2                                    | 1.53  | 1.76E-03 |
| 9612   | nuclear receptor co-repressor 2                                                     | 1.53  | 1.83E-04 |
| 1717   | 7-dehydrocholesterol reductase                                                      | 1.54  | 3.45E-06 |
| 4627   | myosin, heavy chain 9, non-muscle                                                   | 1.55  | 9.29E-04 |
| 4047   | lanosterol synthase (2,3-oxidosqualene-lanosterol cyclase)                          | 1.58  | 5.14E-05 |
| 3157   | 3-hydroxy-3-methylglutaryl-Coenzyme A synthase 1 (soluble)                          | 1.67  | 3.31E-06 |

### Table S2.

Names of genes with significant changes in expression levels as compared to untreated control cells following 24 hour treatment with 10 nM citrate stabilized gold nanoparticles. A threshold of 1.5 fold change in gene expression and p-values < 0.05 was applied.

## Supplemental Figure S1

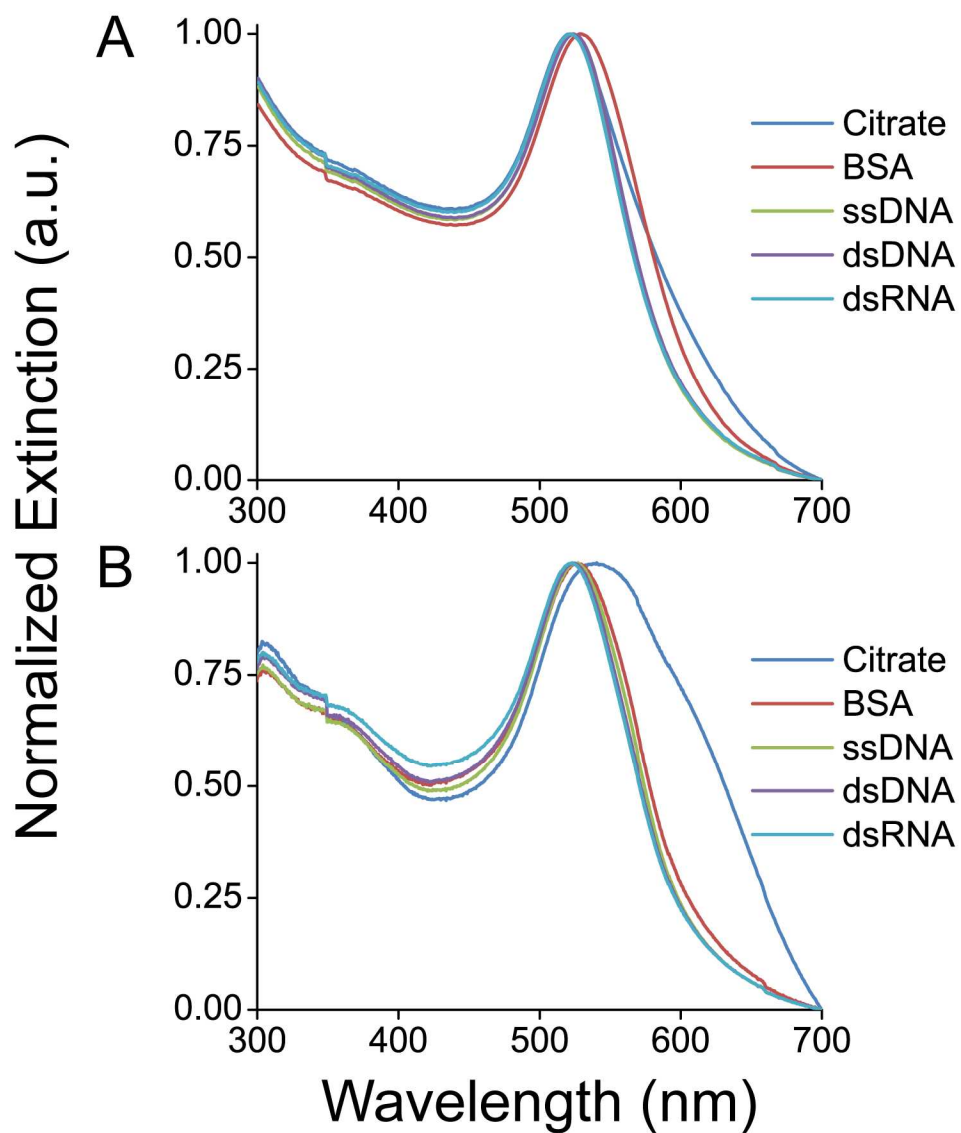

### Figure S1.

(A) UV-Vis spectra of each of the nanoparticle types following synthesis and functionalization. (B) UV-Vis spectra of each of the nanoparticle types following 24 hours of incubation with cell culture medium. A distinct red-shift in the plasmon resonance of the citrate stabilized nanoparticles is observed following incubation with the cell culture medium.

## Supplemental Figure S2

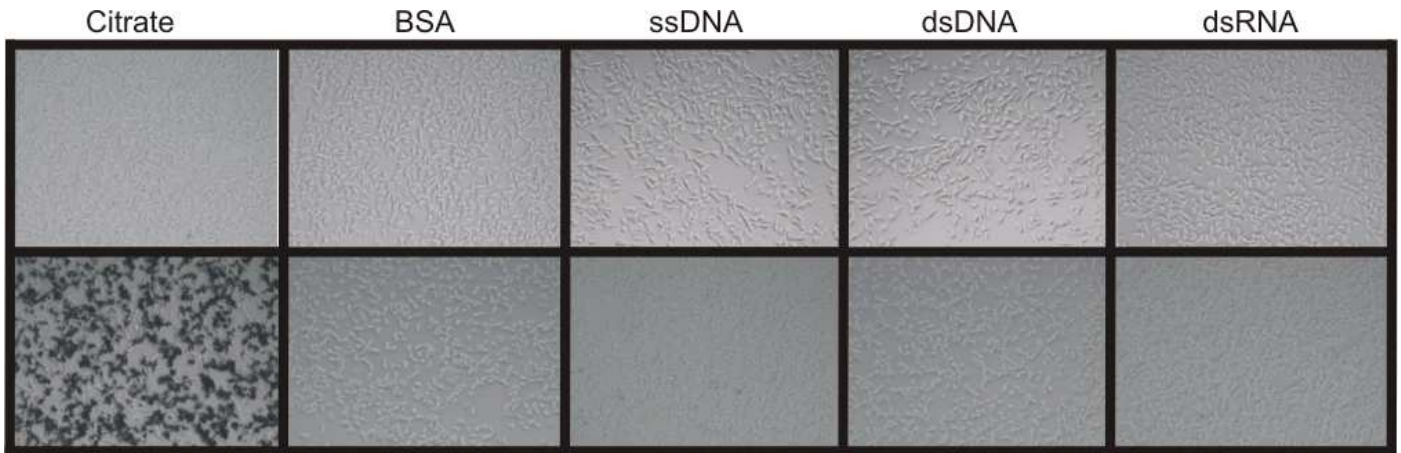

### Figure S2.

Immediately following transfection (top row), the citrate stabilized nanoparticles shifted in color from red to purple indicating particle aggregation, but no signs of particles settling out of solution were observed. However, by 24 hours (bottom row) the citrate stabilized gold nanoparticles have clearly aggregated and settled to the bottom of the culture dish. All other nanoparticle treatment conditions maintained their red color and remained stable under cell culture conditions over the 24 hour time period.

### Supplemental Figure S3

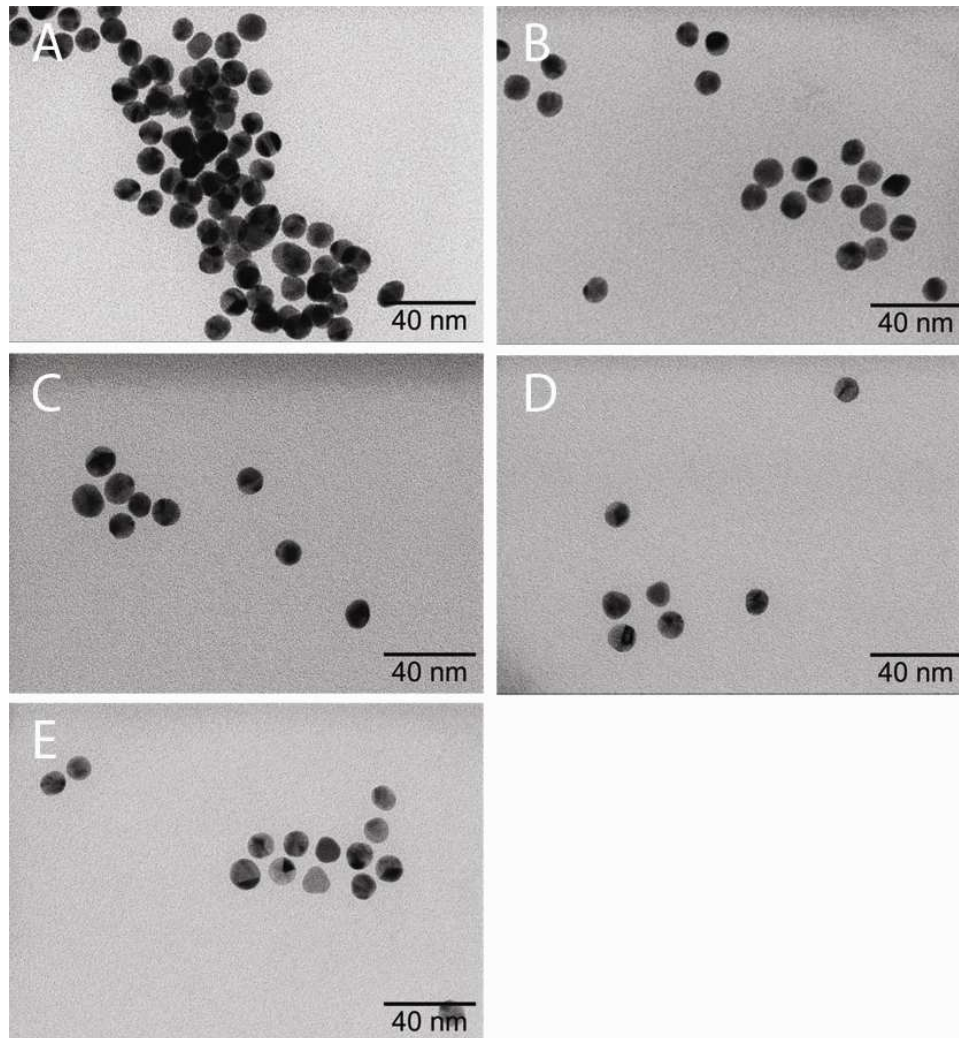

#### Figure S3.

TEM images of citrate stabilized nanoparticles (A), BSA coated nanoparticles (B), ssDNA functionalized nanoparticles (C), dsDNA functionalized nanoparticles (D), and dsRNA functionalized nanoparticles (E) following 24 hours of incubation in cell culture medium. Although still distinct particles, the citrate stabilized particles were found to be more often localized in tighter clusters of nanoparticles than the other particle types.
